# Supplementary material
Source: Springer Nature journal article supplement (https://www.springermedizin.de/resource/supplementary/12991_2007_571_MOESM1_ESM.pdf/9614674)

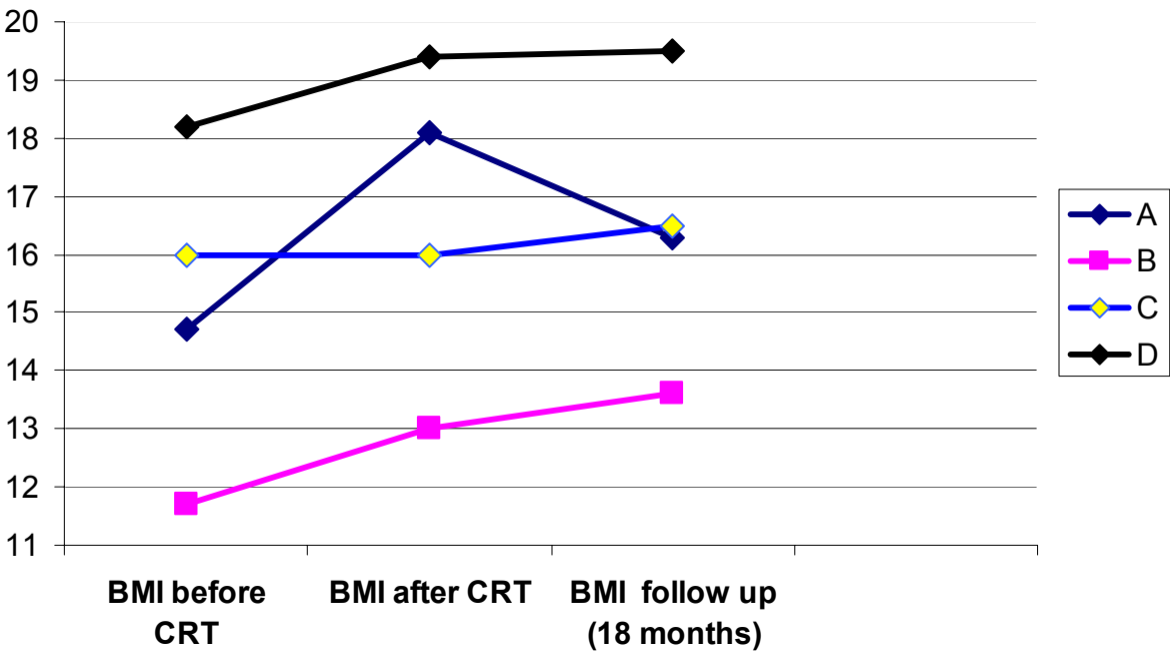

Supplement: MOESM1 [file 9614674]
